# Supplementary material for: Localization and Spectroscopic Analysis of the Cu(I) Binding Site in Wheat Metallothionein Ec-1
Source: PubMed Central journal article supplement (PMC4813231; doi:10.3390/ijms17030371), 2016-03-11
Supplement: ijms-17-00371-s001.pdf [file ijms-17-00371-s001.pdf]

# Supplementary Materials: Localization and Spectroscopic Analysis of the Cu(I) Binding Site in Wheat Metallothionein E<sub>c</sub>-1

Katsiaryna Tarasava, Jens Loebus and Eva Freisinger

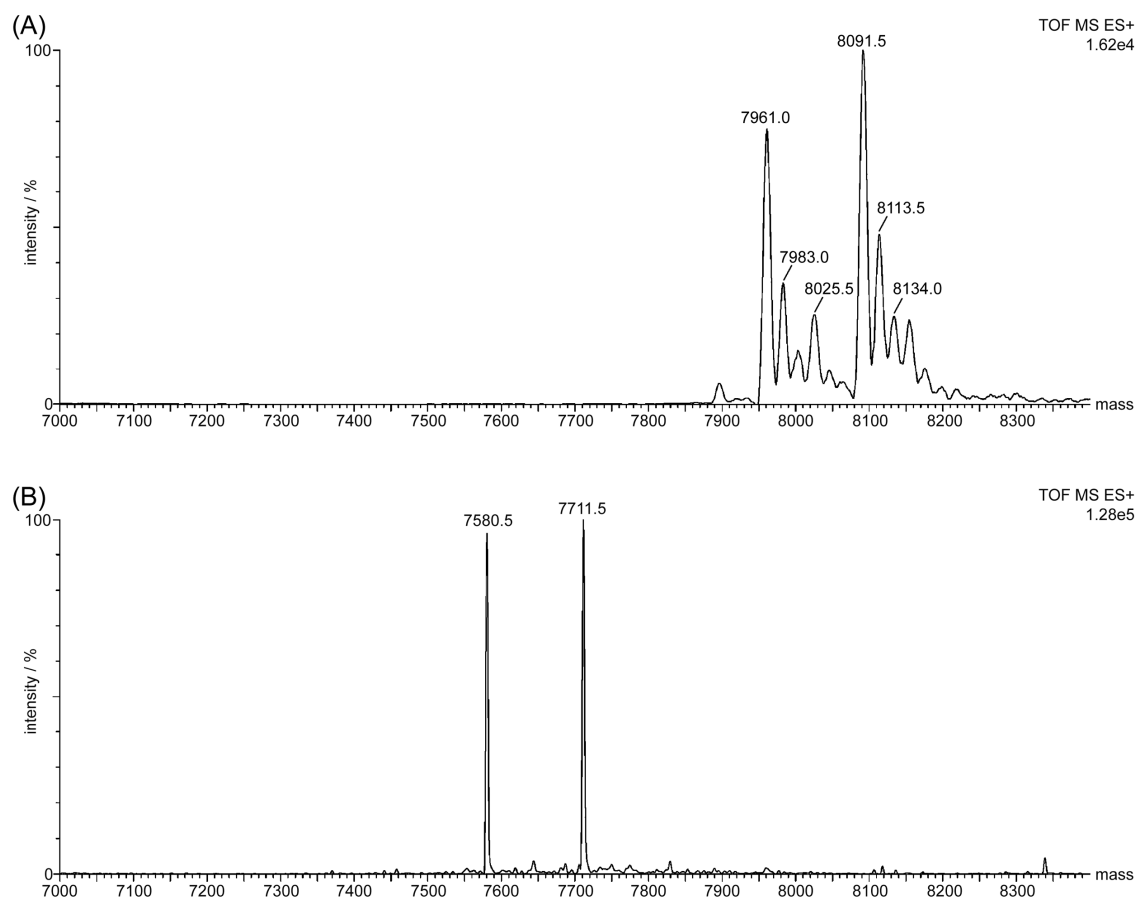

**Figure S1.** Deconvoluted ESI-MS spectra of Zn<sub>6</sub>E<sub>c</sub>-1 acquired at (A) pH 7.5 and (B) pH 2, representing the fully Zn(II)-loaded and apo species, respectively. The two main species in each spectrum correspond to the full-length protein with and without the N-terminal Met residue. Minor signals in (A) are due to Na<sup>+</sup>-adduct formation. M(calc): Zn<sub>6</sub>E<sub>c</sub>-1 8092.8 Da, Zn<sub>6</sub>E<sub>c</sub>-1 (-Met) 7961.7 Da, apo-E<sub>c</sub>-1 7712.5 Da, apo-E<sub>c</sub>-1 (-Met) 7581.4 Da.

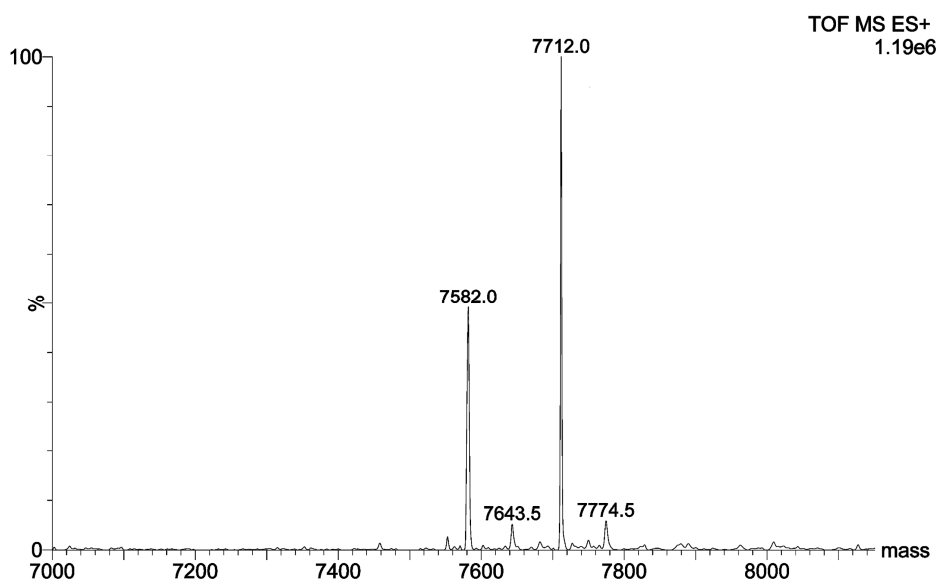

**Figure S2.** Deconvoluted ESI-MS spectrum of Zn<sub>6</sub>Ec-1 after addition of 1 equiv. of Cu(I) acquired at pH 2. The masses of 7712.0 Da and 7582.0 Da correspond to apo-Ec-1 with and without the N-terminal Met residue ( $M(\text{calc})$  7712.5 Da and 7581.4 Da), respectively, and show that the protein is in the fully reduced state. The additional signals at 7643.5 and 7774.5 Da can be assigned to the two Ec-1 species in complex with one Cu(I) ion each and after deprotonation of two thiolate groups required for coordination ( $M(\text{calc})$  7775.0 Da and 7643.9 Da). Residual Cu(I) coordination is due to the rather low apparent  $pK_a$  value of the Cys thiolates in presence of Cu(I), *i.e.*, around  $pK_a \sim 2$  [37,38]). However, the exact apparent  $pK_a$  values for the mixed Zn(II)Cu(I)-Ec-1 species were not determined and in addition, the different charges of the apo- and Cu<sub>1</sub>-form do not allow a precise quantification of species.

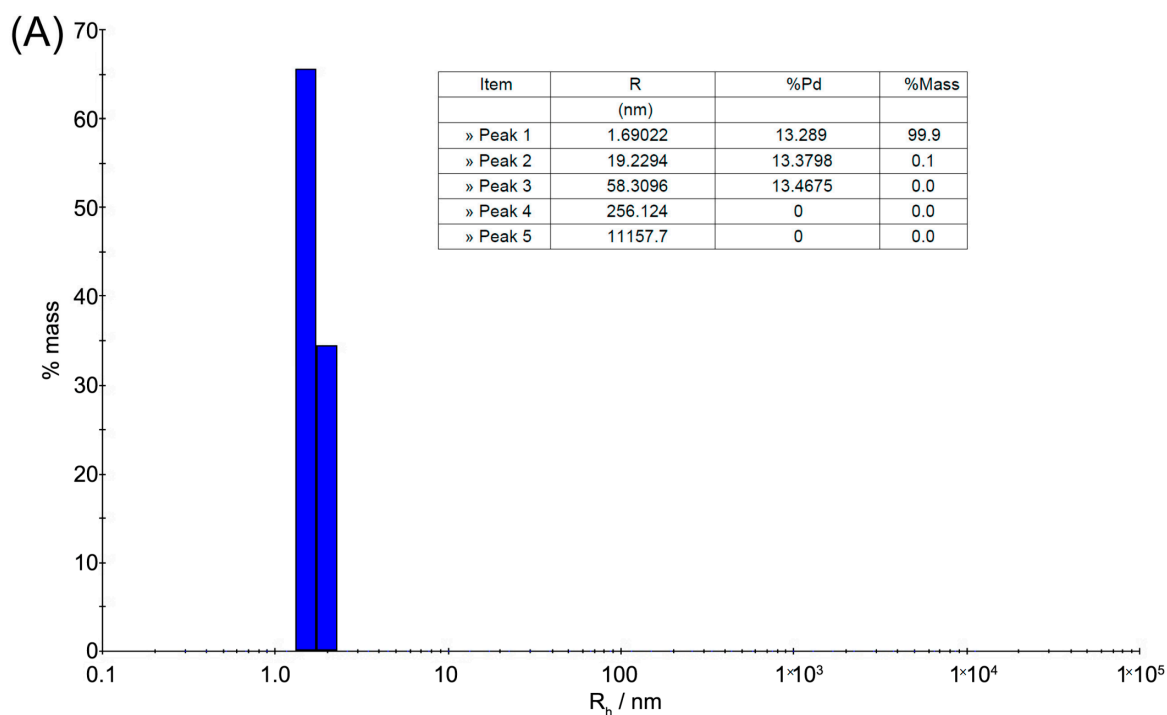

**Figure S3.** Cont.

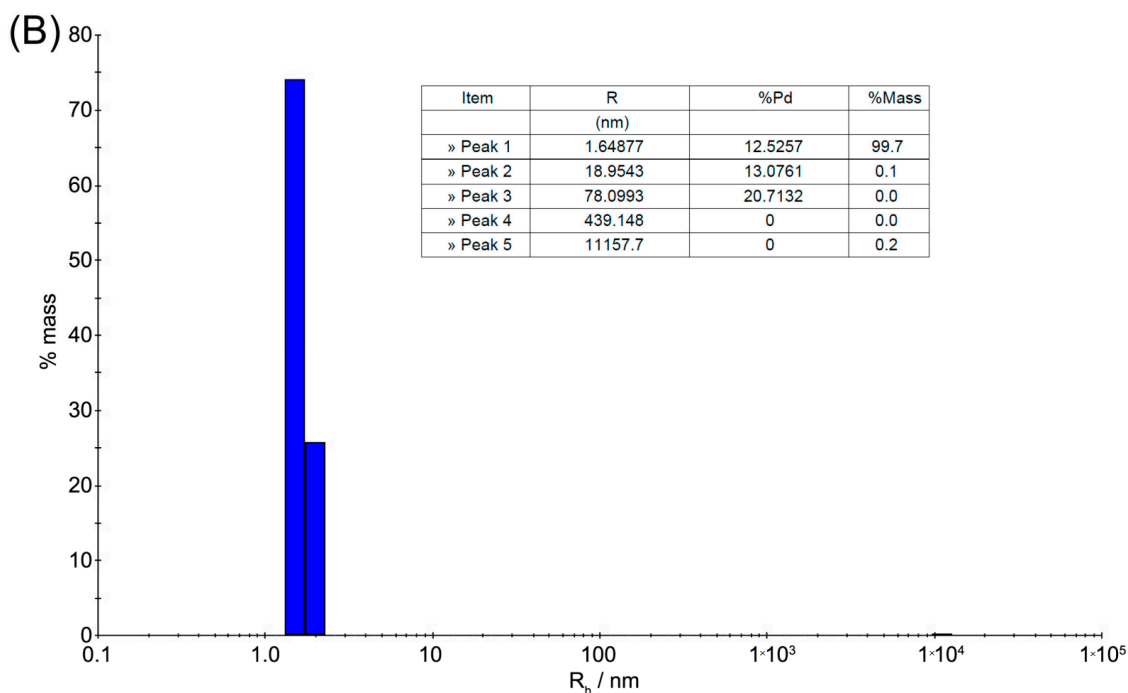

**Figure S3.** Examples of histograms from dynamic light scattering experiments conducted with (A) Zn<sub>6</sub>Ec-1 and (B) CuZn<sub>5</sub>Ec-1 revealing identical hydrodynamic radii of the two protein forms, *i.e.*, 1.69 and 1.65 nm for the depicted measurements, and only very minor traces of higher molecular mass species such as, e.g., Ec-1 aggregates (buffer: 10 mM Tris-HCl, 10 mM NaCl, pH 7.5; temperature: 15 °C; number of acquisitions: 10).

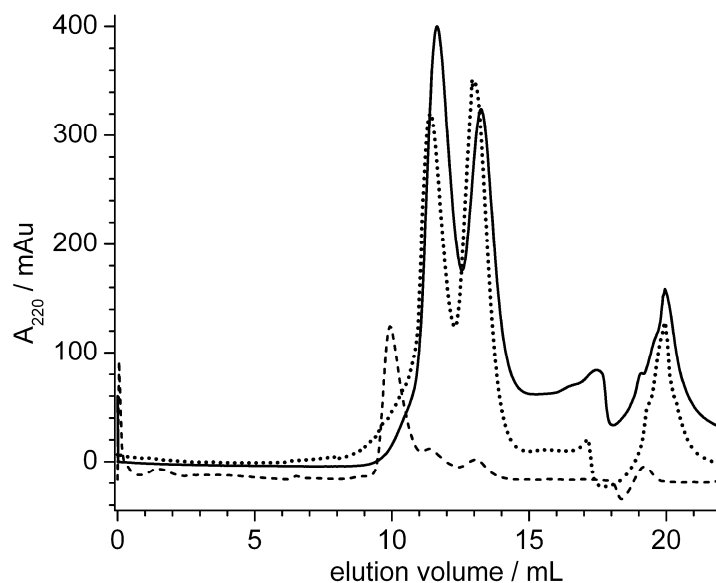

**Figure S4.** Size exclusion chromatogram of full-length Zn<sub>6</sub>Ec-1 (dashed line) as well as Zn<sub>6</sub>Ec-1 (solid line) and CuZn<sub>5</sub>Ec-1 (dotted line) after digestion with proteinase K. The peak at 10.0 mL corresponds to full-length Zn<sub>6</sub>Ec-1, at approx. 11.5 mL to the β<sub>E-1</sub>, and at approx. 13.2 mL to the γ-domain of Ec-1. (column: HiLoad 16/600 Superdex 75 pg column (GE Healthcare, Glattbrugg, Switzerland); buffer: 10 mM ammonium acetate, pH 7.5). Additional peaks above approximately 17 mL belong to small molecular weight components of the buffer.

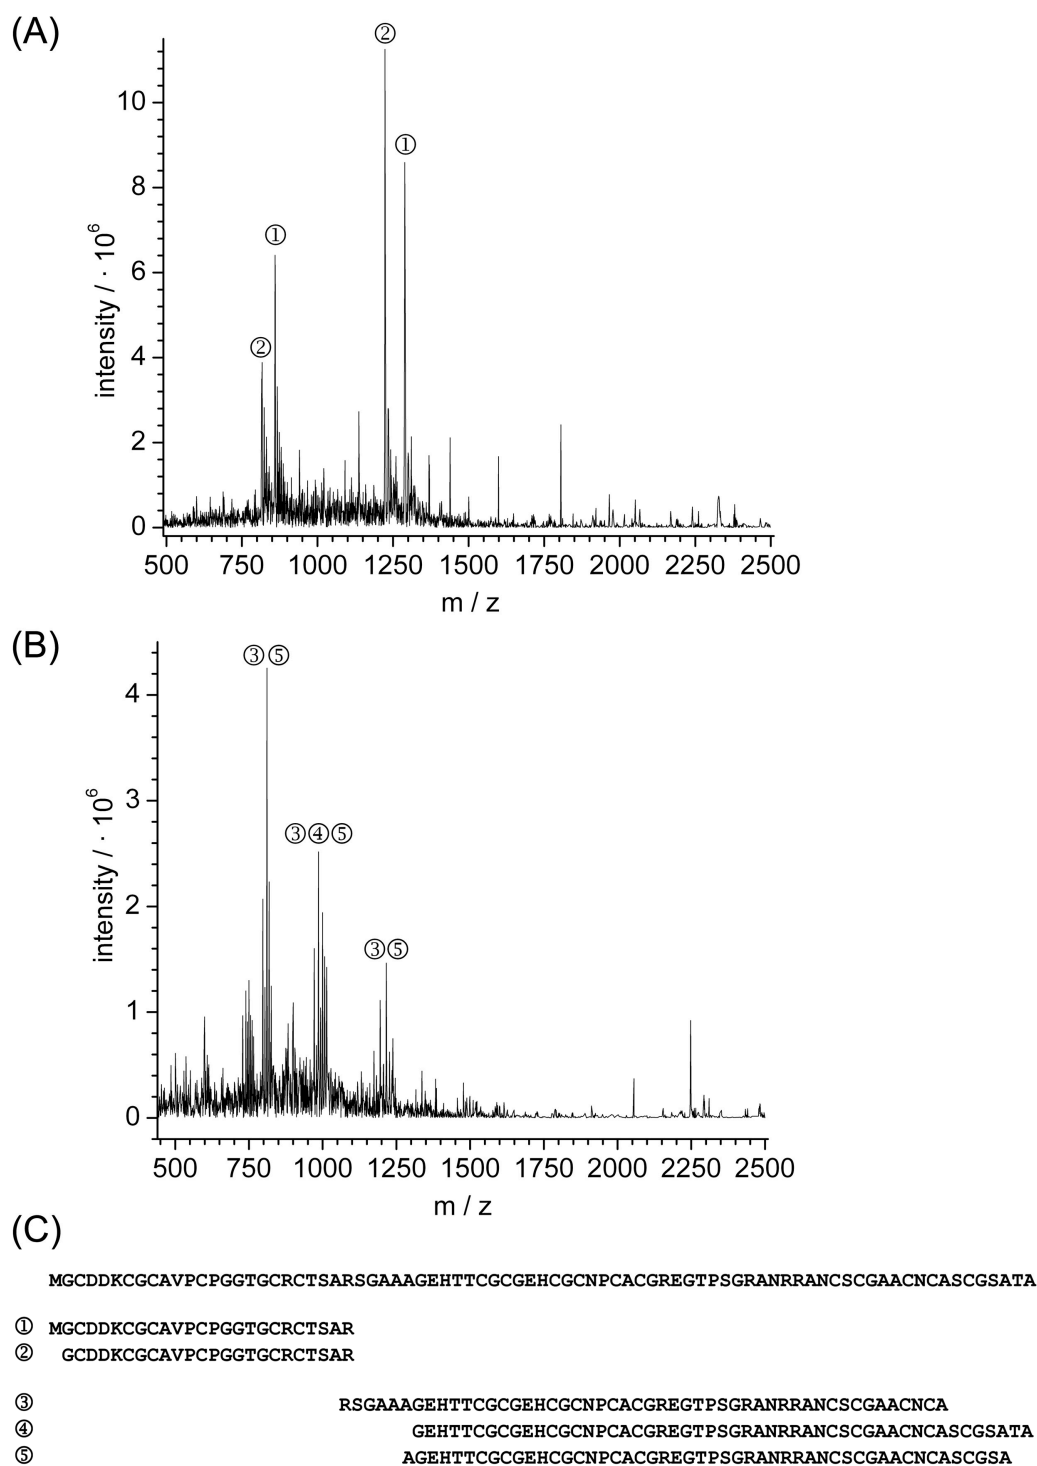

**Figure S5.** Analysis of peptide fragments obtained after digestion of Zn<sub>6</sub>E<sub>c</sub>-1 with proteinase K. The non-deconvoluted ESI-MS spectrum of the peak at 13.2 mL (Figure S5) is shown in (A) and main signals are assigned to the respective fragments of the  $\gamma$ -E<sub>c</sub>-1 domain as shown in part (C) and Table S2 (below); (B) Non-deconvoluted ESI-MS spectrum of the peak at 11.5 mL (Figure S5) revealing the fragments of the  $\beta$ <sub>E</sub>-domain shown in (C) as main signals. The spectra were measured in ammonium acetate buffer, pH 7.5, and hence also various Zn(II)-adducts can be detected. However, Zn(II)-binding to the  $\beta$ <sub>E</sub>-domain is not stable under the ionization conditions used and hence only adducts with 1 or 2 Zn(II) ions but not more are detected.

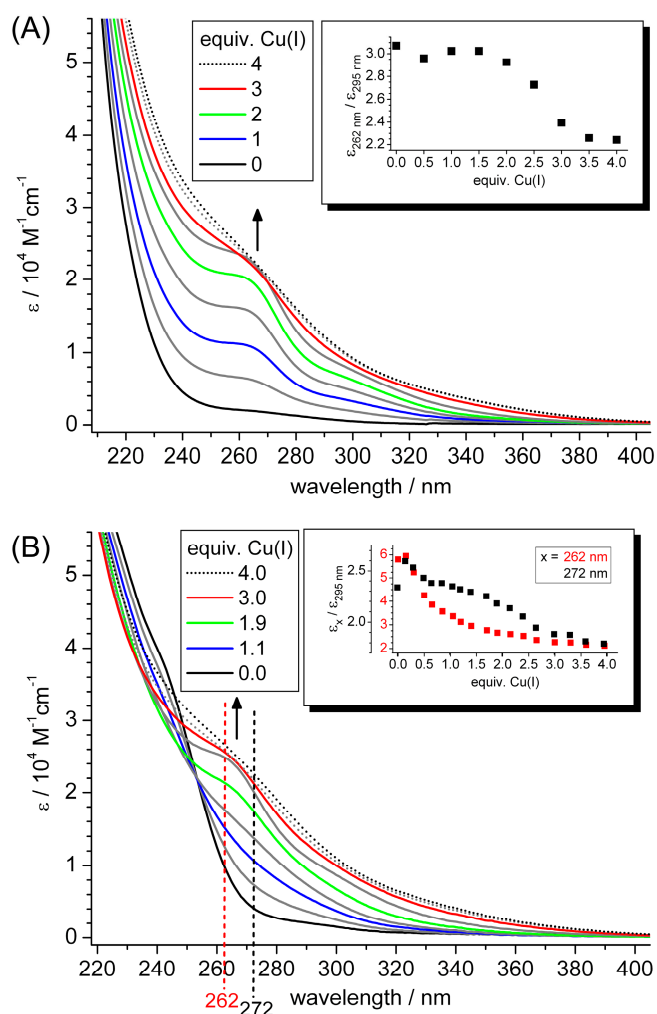

**Figure S6.** Set of UV/VIS spectra of the titration of apo- $\gamma$ -Ec-1 (A) and Cd<sub>2</sub> $\gamma$ -Ec-1 (B) with Cu(I) ions. Dotted spectra indicate the point of constant spectral features. Insets: Absorptivity ratio  $\epsilon_{262 \text{ nm}}/\epsilon_{295 \text{ nm}}$  to visualize the changing contribution of LMCT bands versus cluster centered transitions. Due to the strong overlap of S  $\rightarrow$  Cd LMCT bands around 250 nm with S  $\rightarrow$  Cu transitions also the ratio  $\epsilon_{272 \text{ nm}}/\epsilon_{295 \text{ nm}}$  was plotted in the inset of (B).

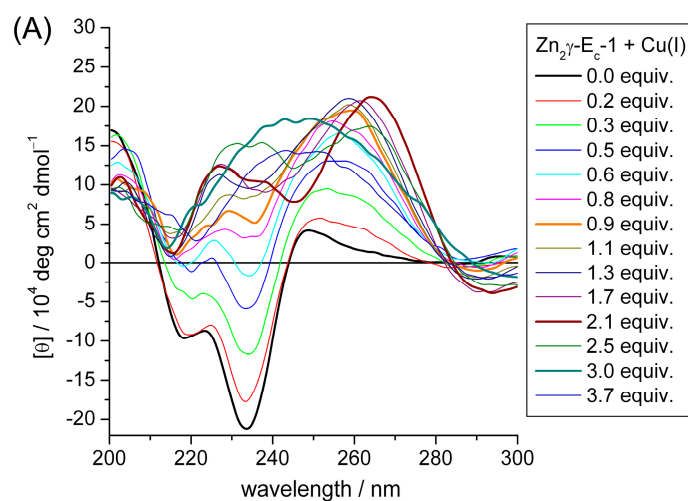

**Figure S6. Cont.**

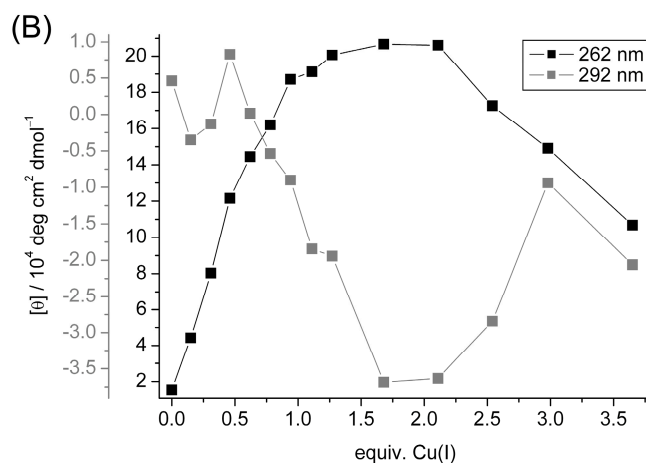

**Figure S7.** Titration of Zn<sub>2</sub>γ-E<sub>c</sub>-1 with Cu(I) ions followed by CD spectroscopy. (A) Evolution of CD spectra; (B) Course of ellipticity values at, or close to, the wavelength of the newly developing maxima observed in the CD spectra.

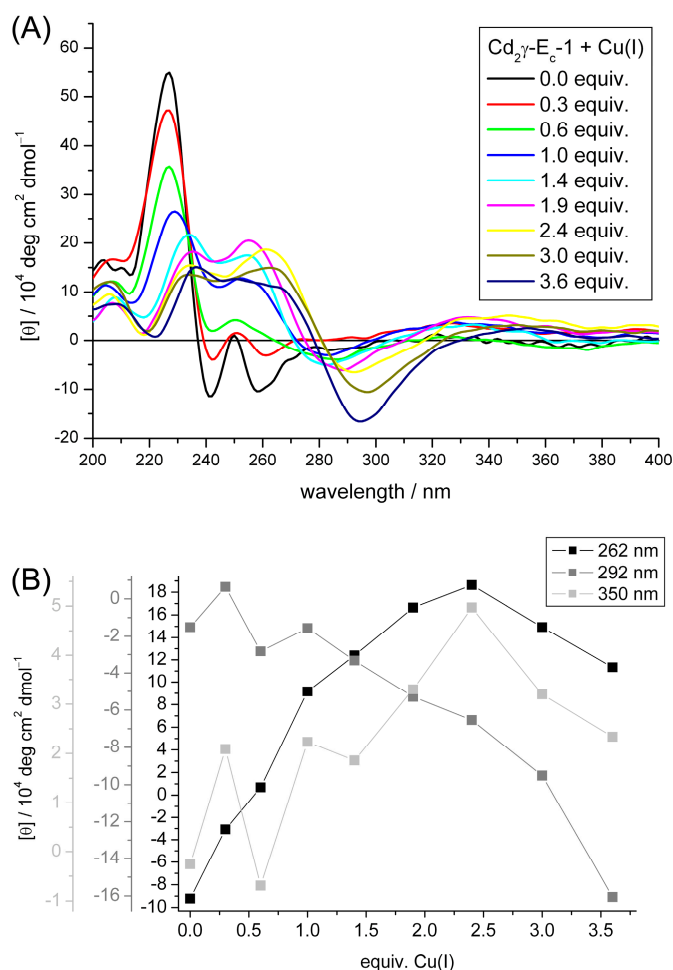

**Figure S8.** Titration of Cd<sub>2</sub>γ-E<sub>c</sub>-1 with Cu(I) ions followed by CD spectroscopy. (A) Evolution of CD spectra; (B) Course of ellipticity values at or close to the wavelength of the newly developing maxima observed in the CD spectra.

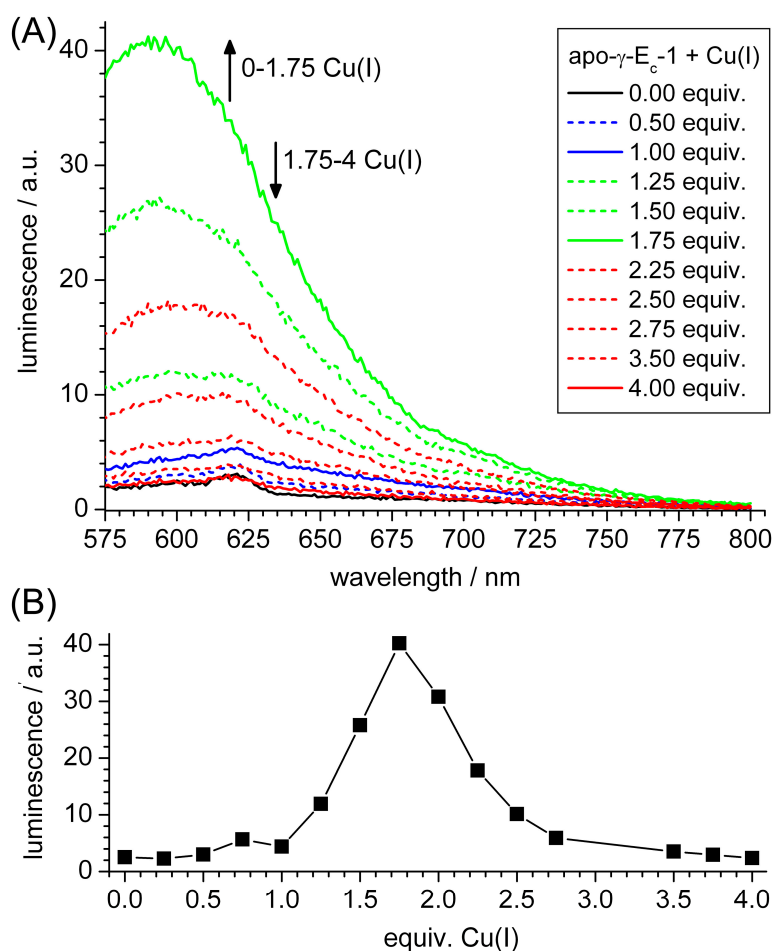

**Figure S9.** Dependence of room temperature luminescence at 600 nm after excitation at 280 nm from the amount of Cu(I) added to apo- $\gamma$ -E<sub>c</sub>-1. (A) Luminescence spectra; (B) plot of luminescence at 600 nm against the equiv. of Cu(I) added.

**Table S1.** Determination of metal ion-to-protein stoichiometries of the mixed Cu(I)-Zn(II) form of E<sub>c</sub>-1 after addition of one equiv. of Cu(I) to Zn<sub>6</sub>E<sub>c</sub>-1 in 50 mM Tris-HCl, pH 7.5, and removal of loosely bound metal ions with SEC or Chelex<sup>®</sup> 100 resin.

|                                                    | SEC   | Chelex <sup>®</sup> 100 |
|----------------------------------------------------|-------|-------------------------|
| [–SH]/ $\mu$ M (2-PDS assay before Cu(I) addition) | –     | 437.8                   |
| [–SH]/ $\mu$ M (2-PDS assay after Cu(I) addition)  | 308.0 | 412.9                   |
| [E <sub>c</sub> -1] <sup>a</sup> / $\mu$ M         | 19.25 | 25.81                   |
| [Zn]/ $\mu$ M <sup>b</sup>                         | 95.29 | 136.00                  |
| [Cu]/ $\mu$ M <sup>b</sup>                         | 9.44  | 19.44                   |
| Zn:E <sub>c</sub> -1                               | 4.95  | 5.27                    |
| Cu:E <sub>c</sub> -1                               | 0.7   | 0.75                    |

<sup>a</sup> The comparison of the –SH concentration determined with the 2-PDS assay before Cu(I) addition with the value after Cu(I) addition and Chelex<sup>®</sup> 100 treatment reveals a decrease of approximately 6% (note that Chelex<sup>®</sup> 100 treatment alone does not decrease the protein concentration!) corresponding to 16 instead of 17 accessible Cys residues. This is probably due to Cu(I)-Cys coordination, which is stable at pH 4. Therefore, protein concentrations were adjusted accordingly (both for SEC and Chelex<sup>®</sup> 100). Importantly, however, no Cys disulfide formation was observed in the ESI-MS spectra excluding oxidation of thiol groups (Figure S2); <sup>b</sup> Metal ion concentrations were determined by F-AAS.

**Table S2.** Assignment of peptide fragments observed in the ESI-MS spectra (Figure S5) after digestion of Zn<sub>6</sub>E<sub>c</sub>-1 with proteinase K. Masses are given in Da. The circled numbers in column 1 correspond to the respective peptide fragments in Figure S5.

| Species      | Mass (calc) | <i>m/z</i> (obs), Mass (obs) |               |                |               |               |
|--------------|-------------|------------------------------|---------------|----------------|---------------|---------------|
|              |             | (+2)                         | (+3)          | (+4)           | (+5)          | (+6)          |
| ① + 2 Zn(II) | 2575.6      | 1288.7, 2575.4               | 859.5, 2575.5 |                |               |               |
| ② + 2 Zn(II) | 2444.4      | 1223.1, 2444.2               | 815.5, 2443.5 |                |               |               |
| ③ + 0 Zn(II) | 4860.3      |                              |               | 1216.0, 4860.0 |               | 811.1, 4860.6 |
| + 1 Zn(II)   | 4923.7      |                              |               |                | 985.7, 4923.5 |               |
| + 2 Zn(II)   | 4987.1      |                              |               |                | 998.3, 4986.5 |               |
| ④ + 0 Zn(II) | 4924.4      |                              |               |                | 985.7, 4923.5 |               |
| + 1 Zn(II)   | 4987.8      |                              |               |                | 998.3, 4986.5 |               |
| ⑤ + 0 Zn(II) | 4823.2      |                              |               | 1205.9, 4819.6 |               | 804.4, 4820.4 |
| + 1 Zn(II)   | 4886.6      |                              |               |                | 978.9, 4889.5 |               |
| + 2 Zn(II)   | 4950.0      |                              |               | 1238.1, 4948.4 |               | 825.8, 4948.8 |

calc: calculated; obs: observed.
